# Supplementary material for: Informed Consent in Surgical Practice - Bridging Ethical Principles and Implementation Challenges in the Democratic Republic of Congo: A Qualitative Exploration
Source: Research Square preprint supplement (doi:10.21203/rs.3.rs-6999921/v1), 2025-07-30
Supplement: Supplementary file 1 [file 31d964c28e98d04d5c092a23.pdf]

English Version: Supplementary Questionnaire

**Title:** Respect for Informed Consent in Surgery in the DRC: Assessment of Practices, Cultural and Systemic Barriers, and Pathways for Ethical Improvement

---

**A. Sociodemographic Information**

1. **Age:** \_\_\_\_\_ (years)
2. **Gender:**
  - ☐ Male
  - ☐ Female
3. **Education Level:**
  - ☐ None
  - ☐ Primary
  - ☐ Secondary
  - ☐ Higher education
4. **Place of Residence:**
  - ☐ Urban
  - ☐ Rural
5. **Province of Residence:** *(Select one)*

|                                     |                                      |                                    |
|-------------------------------------|--------------------------------------|------------------------------------|
| <input type="radio"/> Équateur      | <input type="radio"/> Mai-Ndombe     | <input type="radio"/> Lomami       |
| <input type="radio"/> Sud-Ubangi    | <input type="radio"/> Kwilu          | <input type="radio"/> Nord-Kivu    |
| <input type="radio"/> Nord-Ubangi   | <input type="radio"/> Kwango         | <input type="radio"/> Sud-Kivu     |
| <input type="radio"/> Mongala       | <input type="radio"/> Tshuapa        | <input type="radio"/> Maniema      |
| <input type="radio"/> Bas-Uele      | <input type="radio"/> Tshopo         | <input type="radio"/> Tanganyika   |
| <input type="radio"/> Haut-Uele     | <input type="radio"/> Sankuru        | <input type="radio"/> Haut-Katanga |
| <input type="radio"/> Ituri         | <input type="radio"/> Kasai          | <input type="radio"/> Lualaba      |
| <input type="radio"/> Kongo-Central | <input type="radio"/> Kasai-Oriental | <input type="radio"/> Haut-Lomami  |
| <input type="radio"/> Kinshasa      | <input type="radio"/> Kasai-Central  |                                    |

## **B. Consent Experience**

*Before surgery, did a doctor or nurse explain:*

### **6. The nature of the surgical procedure?**

- ☐ Yes
- ☐ No
- ☐ Don't know

### **7. Possible risks?**

- ☐ Yes
- ☐ No
- ☐ Don't know

### **8. Alternative treatments to surgery?**

- ☐ Yes
- ☐ No
- ☐ Don't know

### **9. Did you receive a consent form to sign or mark (e.g., fingerprint)?**

- ☐ Yes
- ☐ No
- ☐ Don't know

### **10. (If yes) Was the form in a language you understand?**

- ☐ Yes
- ☐ No
- ☐ Partially

### **11. Did you have time to ask questions before deciding?**

- ☐ Yes
- ☐ No
- ☐ A little

### **12. Who made the final decision for your surgery?**

- ☐ Yourself alone
- ☐ Your family
- ☐ The doctor

### **13. Did you feel pressured to accept the surgery?**

- ☐ Yes
- ☐ No
- ☐ Prefer not to answer

### **C. Understanding and Satisfaction**

**14. Did you believe you had the right to refuse surgery?**

- ☐ Yes
- ☐ No
- ☐ Don't know

**15. Do you feel you were adequately informed?**

- ☐ Yes
- ☐ No
- ☐ Partially

**16. Would you recommend this hospital to a relative?**

- ☐ Yes
- ☐ No
- ☐ Maybe

---

### **D. Open-Ended Question (Optional)**

**17. What improvements would you suggest in how surgical procedures are explained to patients?**

---

---

---

---

---
